# Supplementary figures and images for: Exploring the Molecular Mechanism of Sepal Formation in the Decorative Flowers of Hydrangea macrophylla ′Endless Summer′ Based on the ABCDE Model
Source: MDPI journal article supplement (doi:10.3390/ijms232214112), 2022-11-15

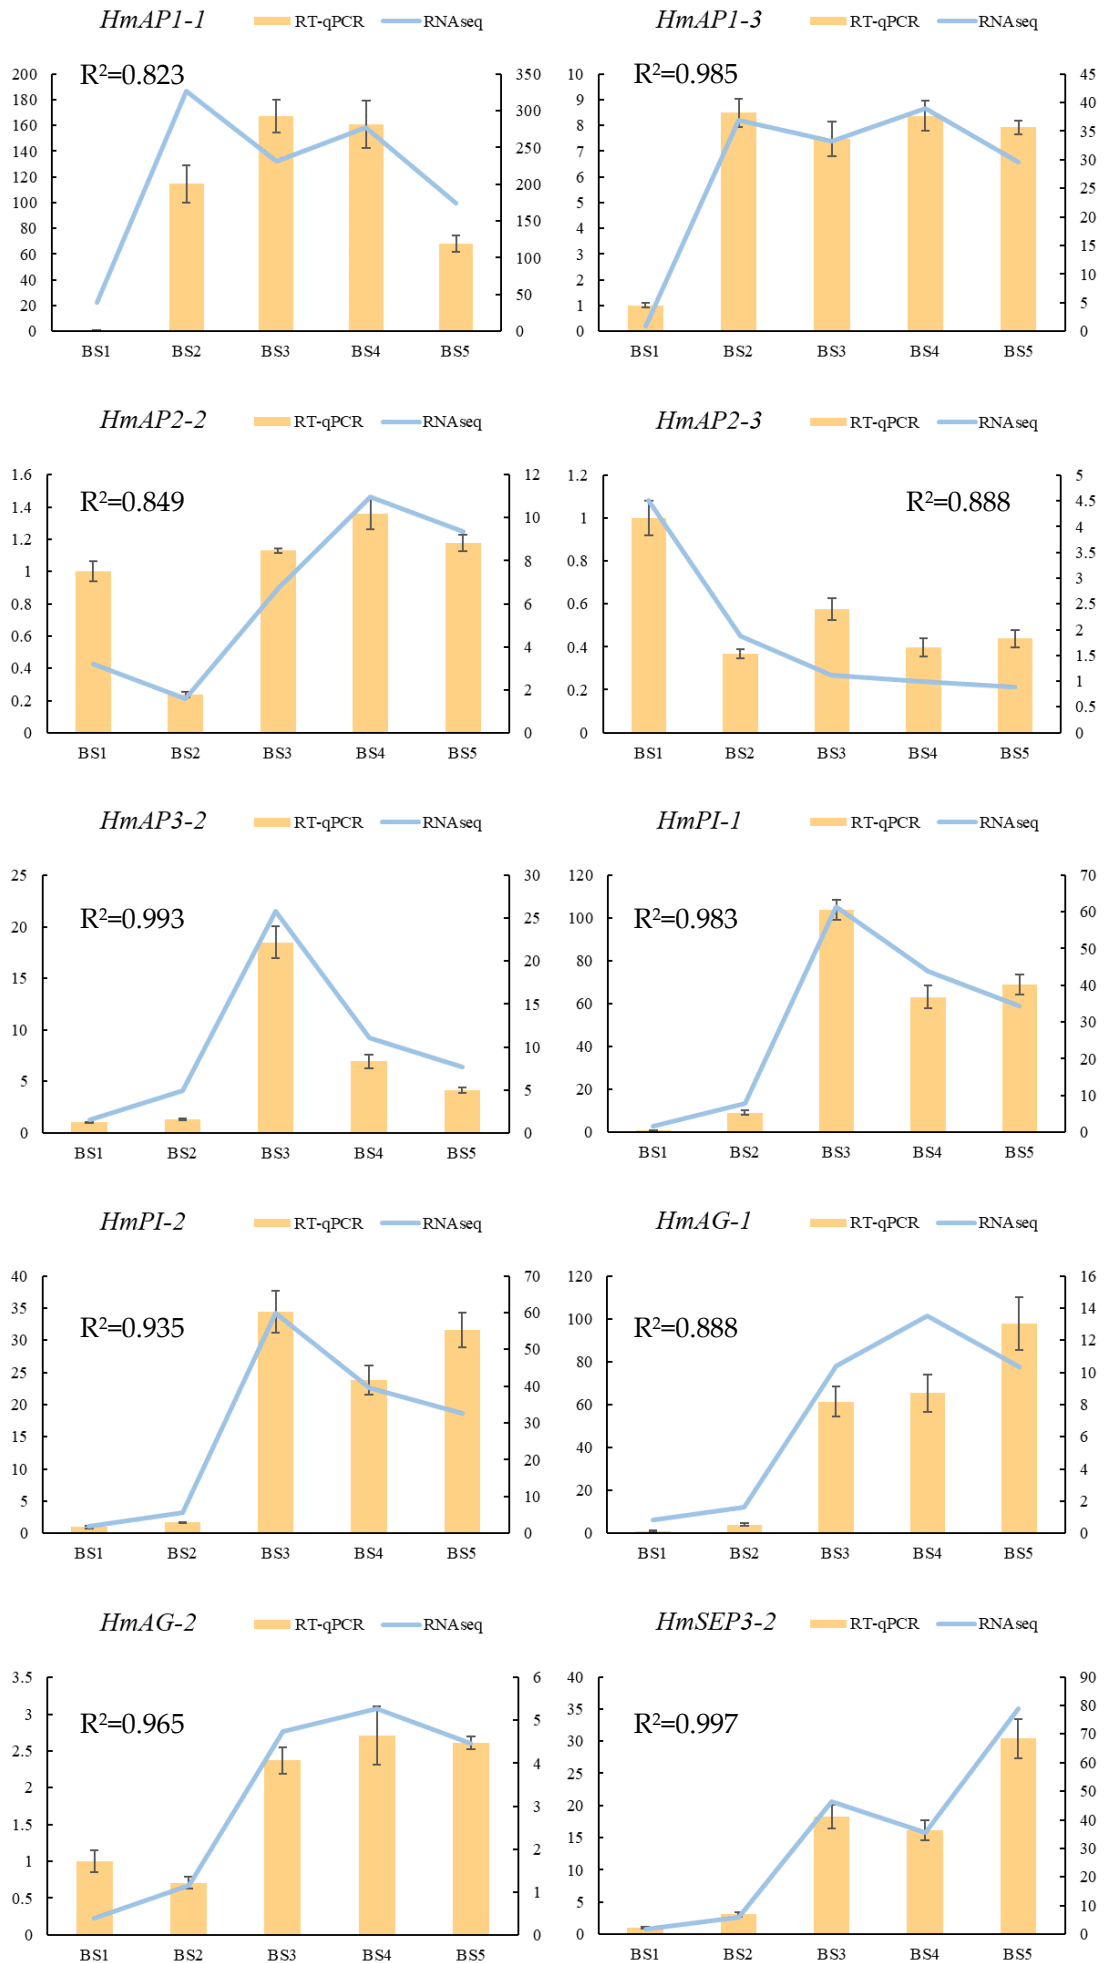

Supplement: s1 [file s1]
